# Supplementary material for: Amphiphilic nanosheet self-assembly at the water/oil interface: computer simulations
Source: Royal Society of Chemistry journal article supplement (doi:10.1039/c6cp08654c), 2017-01-01
Supplement: c6cp08654c1.pdf [file c6cp08654c1.pdf]

1

## Supplementary Information

### 2 **Amphiphilic Nanosheets Self-assembly at the** 3 **Water/Oil Interface: Computer Simulations**

4 *Wenjun Xiang<sup>a</sup>, Shuangliang Zhao<sup>b</sup>, Xianyu Song<sup>c,\*</sup>, Shenwen Fang<sup>d</sup>, Fen Wang<sup>a</sup>,*

5 *Cheng Zhong<sup>b</sup>, Zhaoyang Luo<sup>b</sup>*

6 <sup>a</sup> School of Chemistry and Chemical Engineering, Sichuan University of Arts and  
7 Science, Dazhou, Sichuan 635000, P. R. China

8 <sup>b</sup>State Key Laboratory of Chemical Engineering, East China University of Science  
9 and Technology, Shanghai 200237, P. R. China

10 <sup>c</sup> Department of Mechanical and Electrical Engineering, Dazhou Vocational and  
11 Technical College, Dazhou, Sichuan 635000, P. R. China

12 <sup>d</sup> College of Chemistry and Chemical Engineering, Southwest Petroleum University,  
13 Chengdu 610500, P. R. China

14

15

16 \*To whom correspondence should be addressed:

17 E-mail: xianyus008@163.com.

18 Present Addresses: Department of Mechanical and Electrical Engineering, Dazhou  
19 Vocational and Technical College, Dazhou, Sichuan 635000, P. R. China

20 Telephone number: +8602883037346

21 Fax number: +8602883037346

22

23

24

25

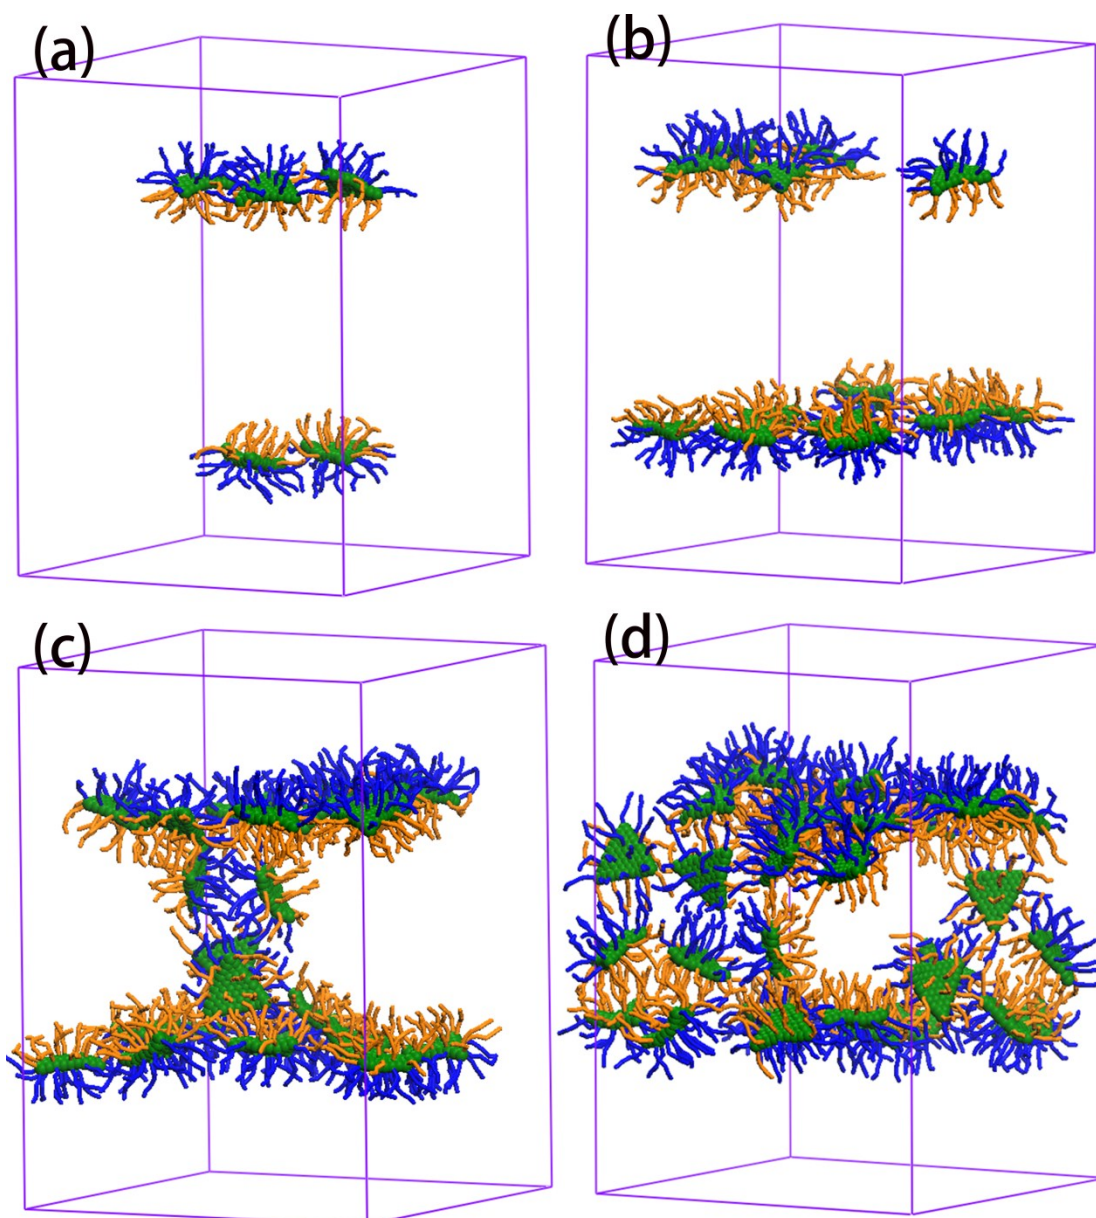

26

27 **Figure S1.** Adsorption morphologies of AJNs at O/W interface with different  
 28 concentrations: (a) 0.06% AJNs, (b) 0.17% AJNs, (c) 0.28% AJNs, (d) 0.43% AJNs.  
 29 The AJNs concentration is described by the number ratio of AJNs molecules to total  
 30 molecules of aqueous phase. The simulated system is case B: the interaction  
 31 parameter  $a_{W-HL}=100$ ,  $a_{W-HB}=125$ .

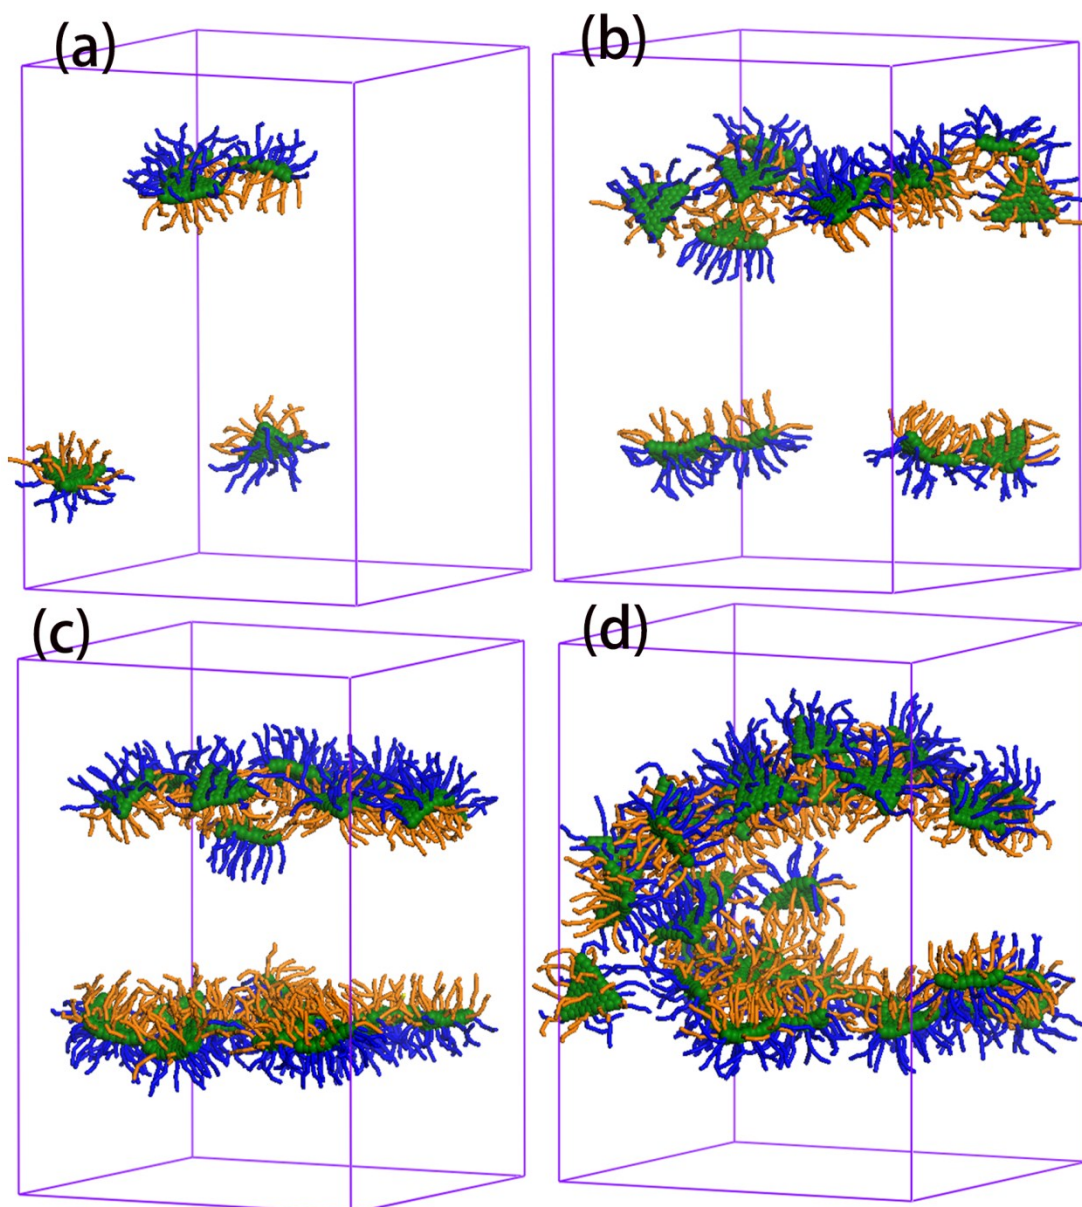

32

33 **Figure S2.** Adsorption morphologies of AJNs at O/W interface with different  
 34 concentrations: (a) 0.06% AJNs, (b) 0.17% AJNs, (c) 0.28% AJNs, (d) 0.43% AJNs.  
 35 The AJNs concentration is described by the number ratio of AJNs molecules to total  
 36 molecules of aqueous phase. The simulated system is case C: the interaction  
 37 parameter  $a_{W-HL} = 110$ ,  $a_{W-HB} = 115$ .

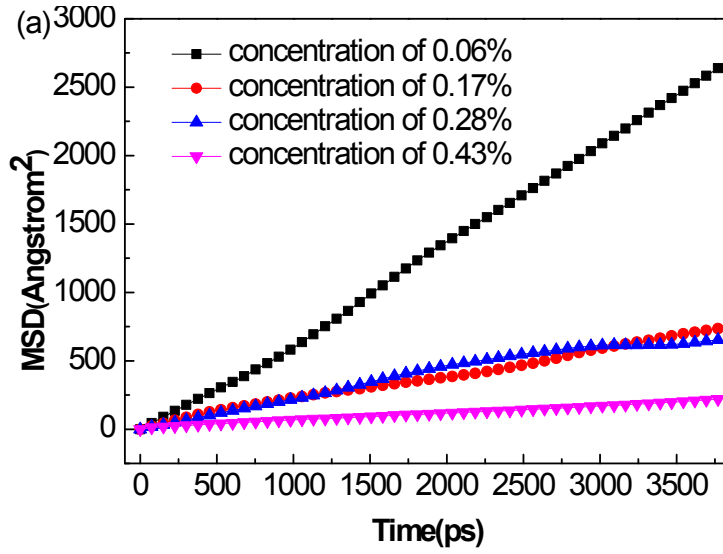

38

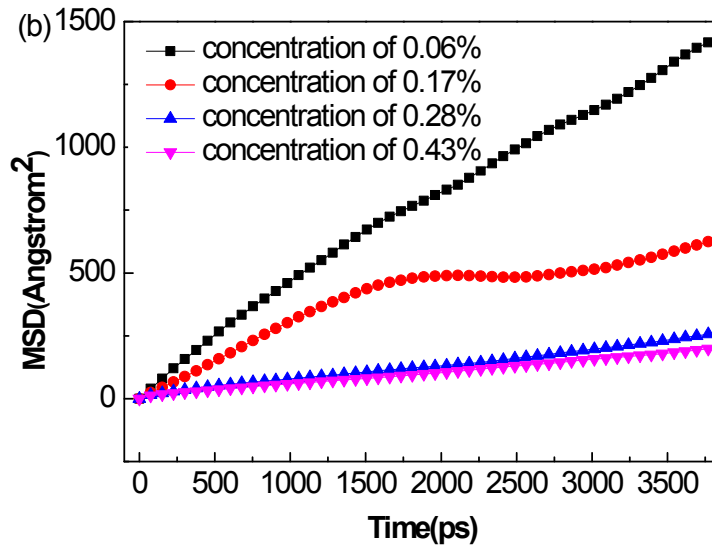

39

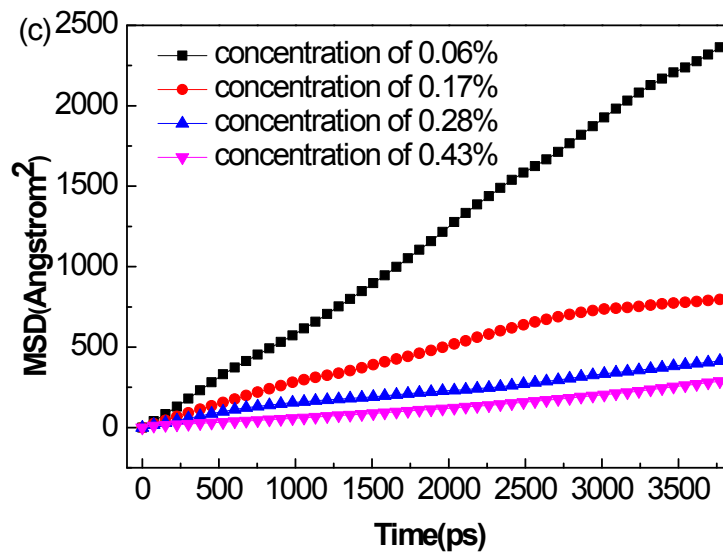

40

41 **Figure S3.** The MSD of AJNs at different concentrations for different simulated  
 42 systems: (a) the interaction parameter  $a_{W-HL} = 80$ ,  $a_{W-HB} = 150$ ; (b) the interaction

43 parameter  $a_{W-HL} = 100$ ,  $a_{W-HB} = 125$ ; (c) the interaction parameter  $a_{W-HL} = 110$ ,  $a_{W-HB}$   
 44  $= 115$ .

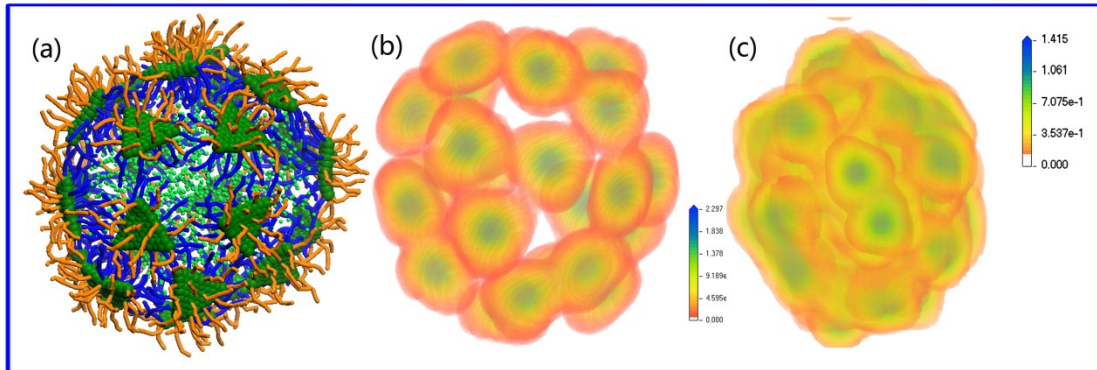

45  
 46 **Figure S4.** (a) Morphologies of water-in-oil emulsions, (b) the density field of  
 47 triangular-nanosheets of AJNs, (c) the density field of AJNs for case A simulated  
 48 system.

49 **Table S1.** Interfacial tension ( $\gamma$ ) as function of surface coverage.

| number of JANs | surface coverage | Interfacial tension( $\gamma$ /DPD units) |          |          |
|----------------|------------------|-------------------------------------------|----------|----------|
|                |                  |                                           |          |          |
| 5              | 0.1              | 6.999126                                  | 7.006602 | 7.017679 |
| 8              | 0.167            | 6.927859                                  | 6.907504 | 6.954463 |
| 14             | 0.3              | 6.681593                                  | 6.882193 | 6.199311 |
| 23             | 0.5              | 6.286384                                  | 5.686764 | 6.232753 |
| 33             | 0.7              | 2.961284                                  | 3.037463 | 3.015898 |

50  
 51
